# Supplementary material for: Wheat germ-derived peptide ADWGGPLPH abolishes high glucose-induced oxidative stress via modulation of the PKCζ/AMPK/NOX4 pathway
Source: Royal Society of Chemistry journal article supplement (doi:10.1039/d0fo01229g), 2020-01-01
Supplement: d0fo01229g1.pdf [file d0fo01229g1.pdf]

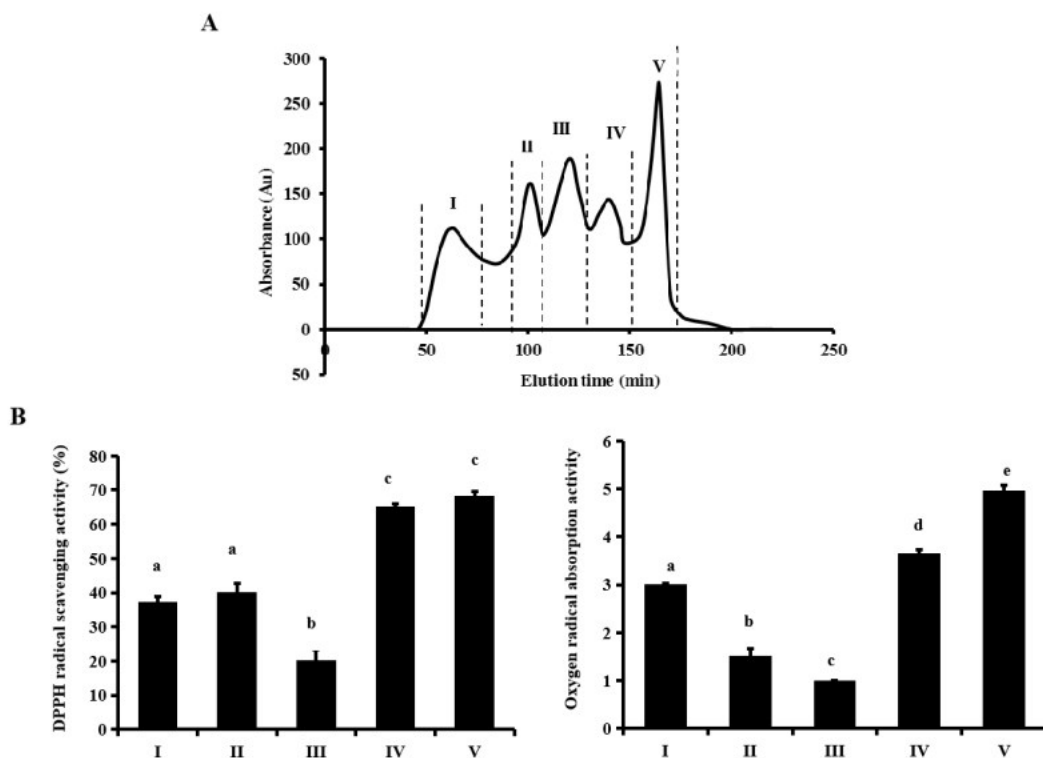

**Fig. S1.** Five fractions, I, II, III, IV, and V, of wheat germ hydrolytes were extracted via Sephadex G25 (A). The DPPH radical scavenging activity and oxygen radical absorption activity of five fractions *in vitro* (B).

**Table S1.** Amino acid sequences of potent peptides in fraction V identified by LC-MS/MS arranged via PeptideRanker results.

| <b>Number</b> | <b>Sequence</b> | <b>MW (Da)</b> | <b>PeptideRanker Results</b> |
|---------------|-----------------|----------------|------------------------------|
| 1             | NDWKQPGW        | 1029.461       | 0.85                         |
| 2             | ADWGGPLPH       | 948.4392       | 0.85                         |
| 3             | ANPWVPSM        | 900.4078       | 0.84                         |
| 4             | YDWPGGRN        | 963.4156       | 0.81                         |
| 5             | GGEDPIRW        | 928.4328       | 0.81                         |
| 6             | PWVPSM          | 715.328        | 0.8                          |
| 7             | TNPLNPW         | 937.4592       | 0.79                         |
| 8             | LNYPY           | 765.3642       | 0.72                         |
| 9             | QQPGQGQPW       | 1024.465       | 0.64                         |
| 10            | GQQPGQGQPW      | 1081.488       | 0.64                         |
| 11            | MPFPSKT         | 806.3878       | 0.62                         |
| 12            | MPFPSKT         | 806.3878       | 0.62                         |
| 13            | VDYPSF          | 726.312        | 0.6                          |
| 14            | GWRGPVPD        | 882.4272       | 0.57                         |
| 15            | YEDWSMPHT       | 900.3368       | 0.52                         |
| 16            | FGADLDAAT       | 879.4044       | 0.36                         |
| 17            | QPYPQQPQ        | 856.401        | 0.36                         |
| 18            | GNPVPPVDQY      | 1084.516       | 0.36                         |
| 19            | EAQANATVFL      | 1062.539       | 0.35                         |
| 20            | TMMAMAT         | 702.2422       | 0.24                         |
